# Supplementary material for: Brexpiprazole–catechol cocrystal: structure elucidation, excipient compatibility and stability
Source: Royal Society of Chemistry journal article supplement (doi:10.1039/c9ce01182j), 2019-01-01
Supplement: c9ce01182j1.pdf [file c9ce01182j1.pdf]

## Supplementary information

### **Brexiprazole-Catechol Cocrystal: Structure Elucidation, Excipient Compatibility and Stability**

Mohsin R. Arabiani<sup>a,c\*</sup>, Bal Raju Kammari<sup>a</sup>, Surojit Bhunia<sup>b</sup>, Pyla Kranthi Teja<sup>b</sup>, Anurag  
Lodagekar<sup>d</sup>, Rahul B. Chavan<sup>a</sup>, Nalini R. Shastri<sup>d</sup>, C Malla Reddy<sup>b</sup>, Pragna Shelat<sup>e</sup>, Divyang  
Dave<sup>e\*</sup>

<sup>a</sup>*Global IP, Amneal Pharmaceuticals Pvt. Ltd, Ahmedabad, Gujarat, India*

<sup>b</sup>*Department of Chemical Sciences, Indian Institute of Science Education and Research  
(IISER) Kolkata, Mohanpur Campus, Mohanpur 741 246, India*

<sup>c</sup>*Kadi Sarva Vishwavidyalaya, Gandhinagar, Gujarat, India*

<sup>d</sup>*Solid State Pharmaceutical Research Group (SSPRG), Department of Pharmaceutics,  
National Institute of Pharmaceutical Education and Research (NIPER), Hyderabad, India*

<sup>e</sup>*K. B. Institute of Pharmaceutical Education and Research, Kadi Sarva Vishwavidyalaya,  
Gandhinagar, Gujarat, India*

\*Corresponding authors. Divyang Dave and Mohsin R Arabiani

**Tel.** +91-79-67778376

**Fax.** +91-79-67778315

**E-mail:** [mohsinr@amnealindia.com](mailto:mohsinr@amnealindia.com); [mohsinalmighty@gmail.com](mailto:mohsinalmighty@gmail.com); [dave.kbiper@gmail.com](mailto:dave.kbiper@gmail.com)

**Address:** Amneal Pharmaceuticals India, 901 – 911, Iscon Elegance, Nr. Hotel Crown Plaza,  
S. G. Highway, Ahmedabad – 380015, Gujarat, India

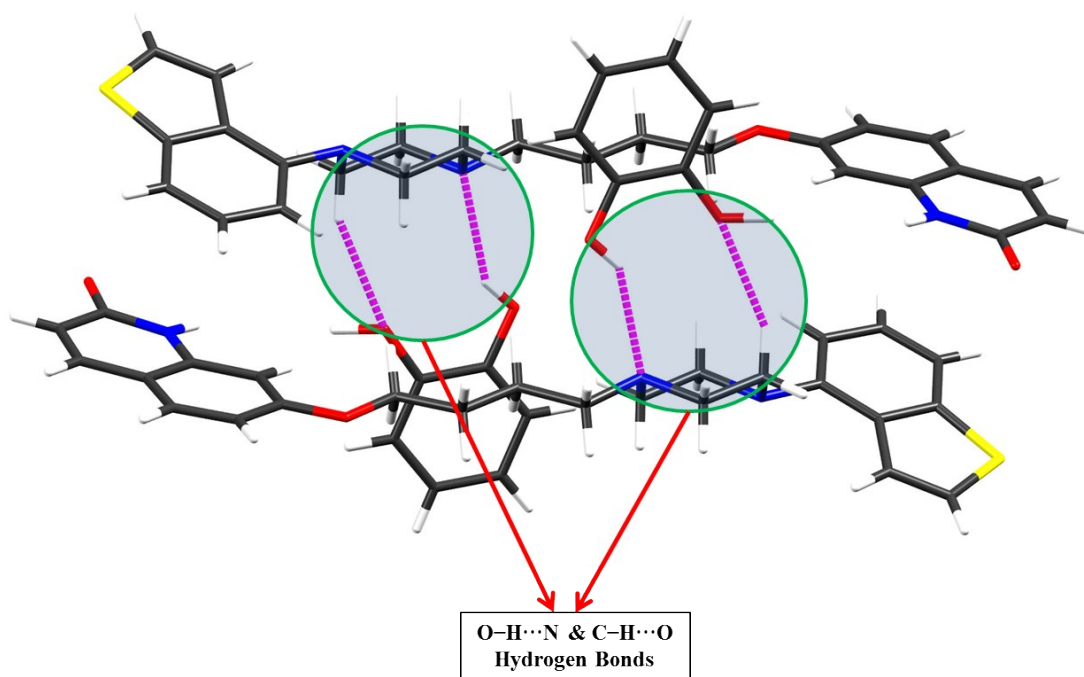

**Figure S1** Representation of hydrogen bonding interactions between BREX and CAT cocrystals.

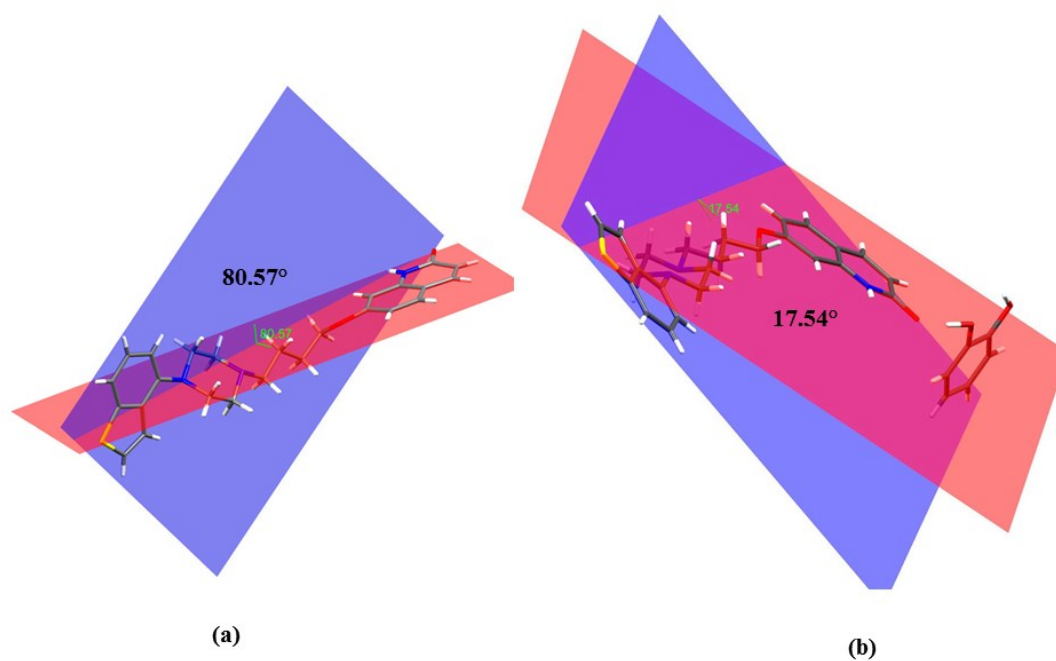

**Figure S2** Representation of conformation angle change between two planer carbostyryl and benzothiaphene.

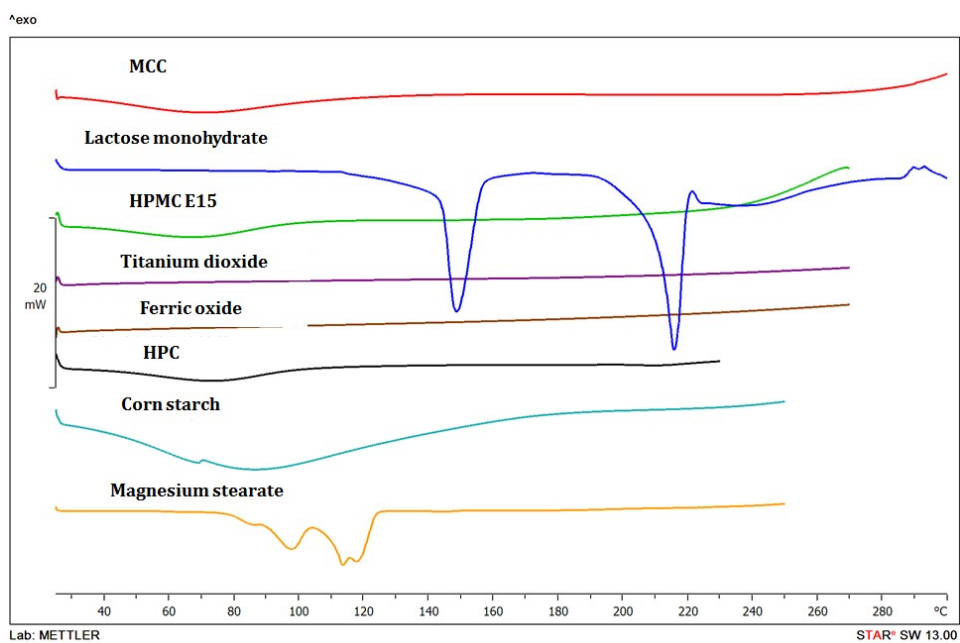

**Figure S3** DSC curves of plain excipients

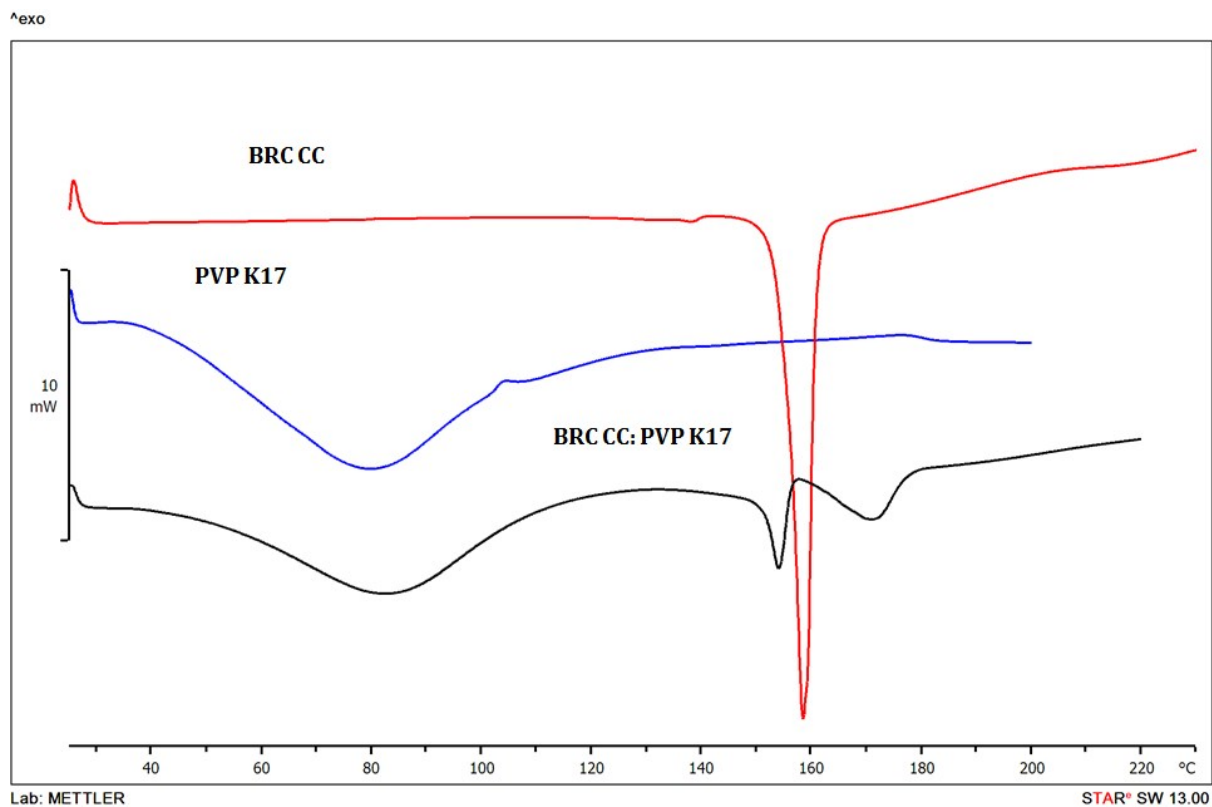

**Figure S4** DSC curves of BRC cocrystal (CC), PVP K17 and physical mixture of cocrystal and PVP K17

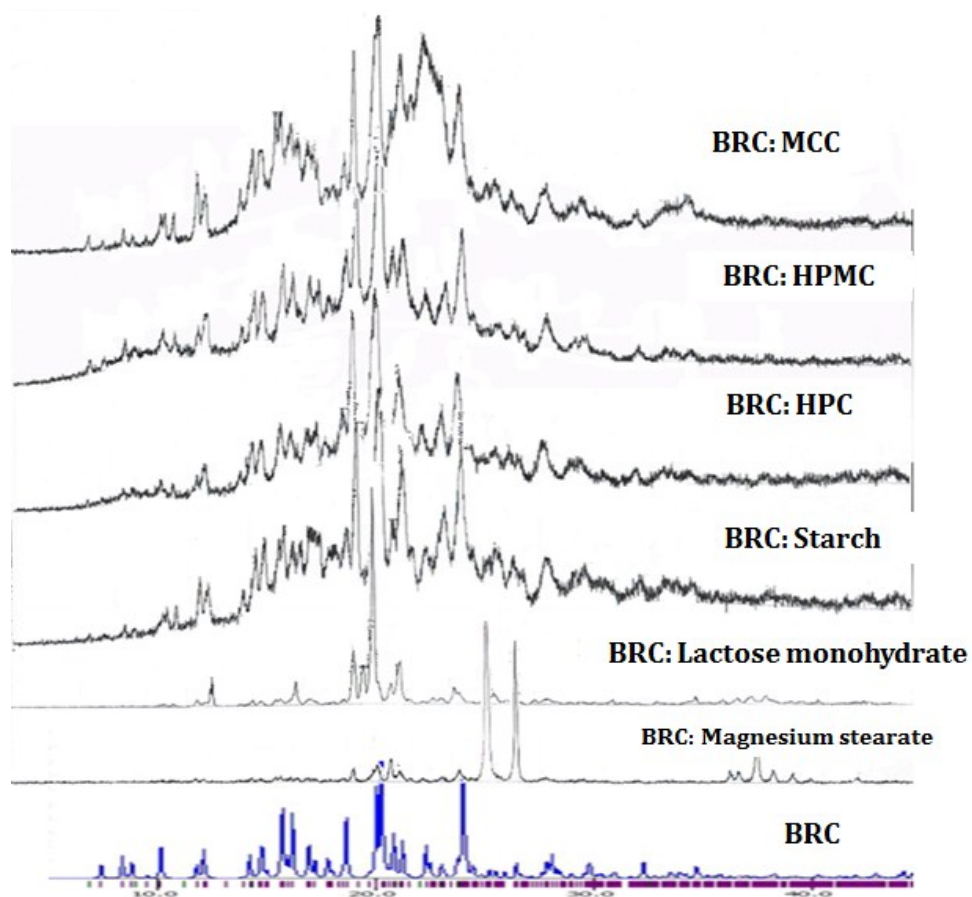

**Figure S5** PXR overlay of excipient compatibility samples with simulated XRD of BRC cocrystal

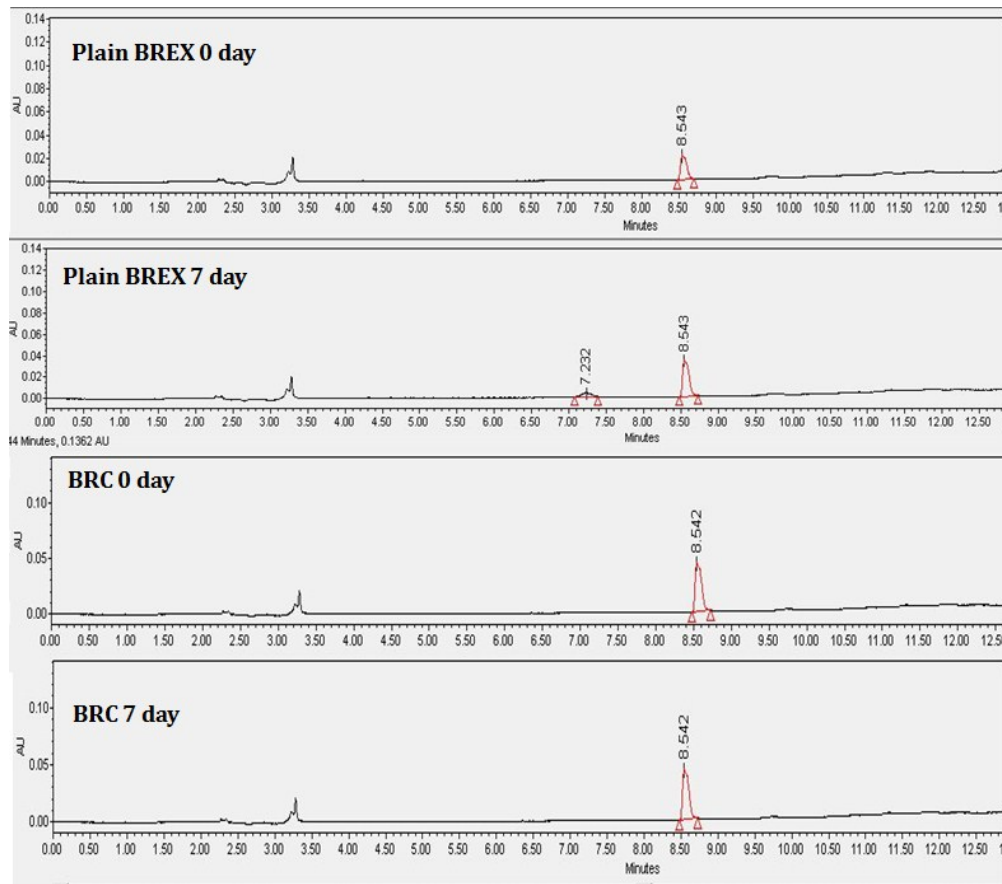

**Figure S6** HPLC chromatograms of BREX and BRC cocrystal before and after stability study

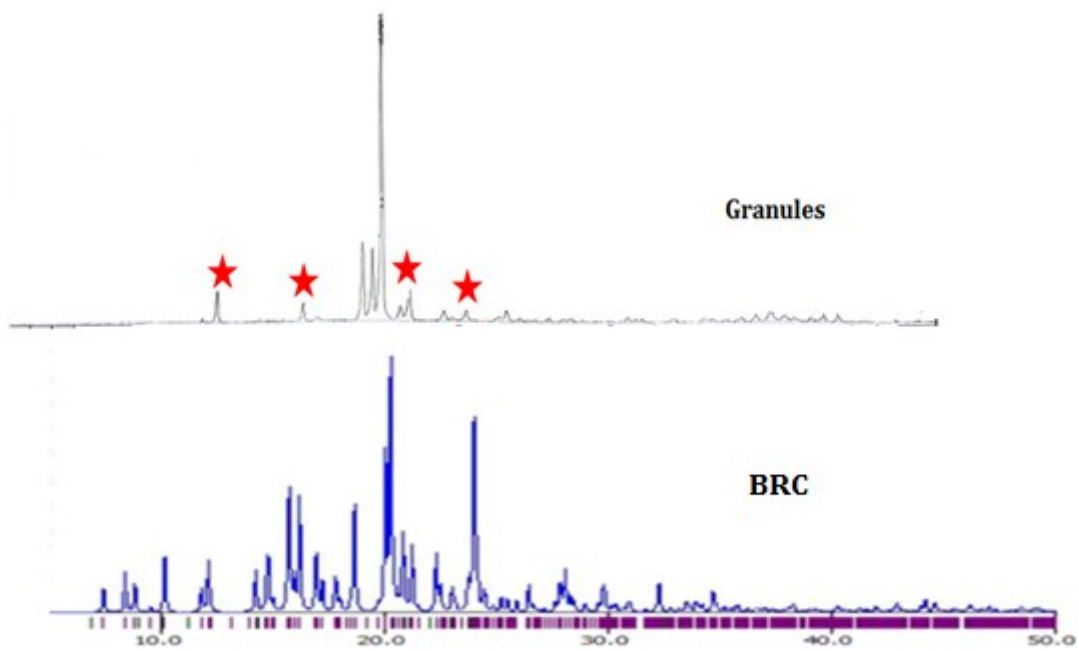

**Figure S7** PXRD overlay of granules and simulated XRD pattern of BRC cocrystal

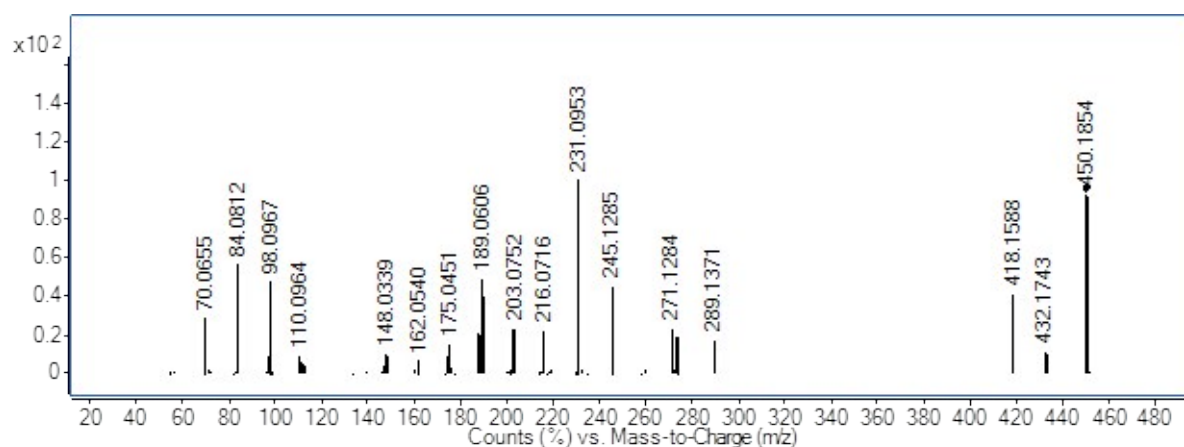

**Figure S8** Mass spectrum of N-oxide impurity of BREX

**Table S1** HPLC parameters

| HPLC Parameter   | Optimized values                                                                 | Gradient program |                       |                       |
|------------------|----------------------------------------------------------------------------------|------------------|-----------------------|-----------------------|
|                  |                                                                                  | Time             | Aqueous content (v/v) | Organic content (v/v) |
| Mobile phase     | Acetonitrile and 10 mM ammonium formate adjusted to pH 4.2 with 0.1N formic acid | 0                | 50                    | 50                    |
| Elution          | Gradient                                                                         | 3                | 40                    | 60                    |
| Flow rate        | 1 ml/min                                                                         | 6                | 30                    | 70                    |
| Wavelength       | 270 nm                                                                           | 9                | 15                    | 85                    |
| Injection volume | 10 µl                                                                            | 12               | 50                    | 50                    |
|                  |                                                                                  | 16               | 50                    | 50                    |

**Table S2** Compositions of granules

| <b>Granules with plain BREX (%w/w)</b> | <b>Granules with BRC cocrystal (%w/w)</b> |
|----------------------------------------|-------------------------------------------|
| Brexpiprazole (4.10)                   | Brexpiprazole (5.12)                      |
| Microcrystalline cellulose (10.75)     | Microcrystalline cellulose (10.75)        |
| Corn starch (21.51)                    | Corn starch (21.51)                       |
| Lactose monohydrate (51.05)            | Lactose monohydrate (51.05)               |
| Magnesium stearate (0.65)              | Magnesium stearate (0.65)                 |
| PVP K17 (1.51)                         | PVP K17 (1.51)                            |
| Titanium dioxide (0.25)                | Titanium dioxide (0.25)                   |
| Ferric oxide (0.56)                    | Ferric oxide (0.56)                       |
| HPC (6.25)                             | HPC (6.25)                                |
